# 1 Revolutionising the design and analysis of protein engineering 2 experiments using fractional factorial design

3

4 Steven P. D. Harborne<sup>1</sup>, Duncan Wotherspoon<sup>1</sup>, Jessica Michie<sup>1</sup>, Alasdair McComb<sup>1</sup>, Tommi Kotila<sup>2</sup>,  
5 Steven G. Gilmour<sup>3</sup> and Adrian Goldman<sup>1,2</sup>

6

7 <sup>1</sup>Astbury Centre for Structural Biology, School of Biomedical Sciences, Faculty of Biological Sciences, University of Leeds,  
8 LS2 9JT, UK

9 <sup>2</sup>Division of Biochemistry, Biological and Environmental Sciences, University of Helsinki, Finland

10 <sup>3</sup>Department of Mathematics, King's College London, Strand, London, WC2R 2LS, UK

11

## 12 **Abstract**

13 Protein engineering is one of the foundations of biotechnology, used to increase protein stability,  
14 re-assign the catalytic properties of enzymes or increase the interaction affinity between antibody  
15 and target. To date, strategies for protein engineering have focussed on systematic, random or  
16 computational methods for introducing new mutations. Here, we introduce the statistical approach  
17 of fractional factorial design as a convenient and powerful tool for the design and analysis of protein  
18 mutations, allowing sampling of a large mutational space whilst minimising the tests to be done.  
19 Our test case is the integral membrane protein, Acridine resistance subunit B (AcrB), part of the  
20 AcrAB-TolC multi-protein complex, a multi-drug efflux pump of Gram-negative bacteria. *E. coli* AcrB  
21 is naturally histidine-rich, meaning that it is a common contaminant in the purification of  
22 recombinantly expressed, histidine-tagged membrane proteins. Coupled with the ability of AcrB to  
23 crystallise from picogram quantities causing false positives in 2-D and 3-D crystallisation screening,  
24 AcrB contamination represents a significant hindrance to the determination of new membrane  
25 protein structures. Here, we demonstrate the use of fractional factorial design for protein  
26 engineering, identifying the most important residues involved in the interaction between AcrB and  
27 nickel resin. We demonstrate that a combination of spatially close, but sequentially distant histidine  
28 residues are important for nickel binding, which were different from those predicted *a priori*.  
29 Fractional factorial methodology has the ability to decrease the time and material costs associated  
30 with protein engineering whilst expanding the depth of mutational space explored; a revolutionary  
31 concept.

32

## 33 **Significance statement**

34 Protein engineering is important for the production of enzymes for bio-manufacturing, stabilised  
35 protein for research and production of therapeutic antibodies against human diseases. Here, we  
36 introduce a statistical method that can reduce the time and cost required to perform protein  
37 engineering. We validate our approach experimentally using the multi-drug efflux pump AcrB, a  
38 target for understanding drug-resistance in pathogenic bacteria, but also a persistent contaminant  
39 in the purification of membrane proteins from *E. coli*. This provides a general method for increasing  
40 the efficiency of protein engineering.

41

42 **Keywords:** Incomplete factorial design, X-ray crystallography, mutagenesis, protein engineering,  
43 purification

44

## 45 **Introduction**

46 Protein engineering is an extremely useful tool in protein biotechnology for applications such as  
47 protein stabilisation, re-assigning the catalytic properties of enzymes or increasing the interaction  
48 affinity between antibody and target. However, a problem arises in the fact that for a protein of  $N$   
49 residues, the number of possible sequences is  $20^N$ . Therefore, for a 300-residue protein the number  
50 of possible sequences is  $20^{300}$  - effectively infinite possibilities. Even scaling this back to consider  
51 just a small subset of positions for mutation provides a colossal number of potential mutations (the  
52 mutation space), which remains a major problem for understanding protein folding and improving  
53 protein function for biotechnological purposes. To date, strategies for protein engineering have  
54 focussed on scanning (1), semi-systematic (2, 3), random (4), directed evolution (5) or  
55 computational methods (6–8) for introducing new mutations.

56 Scanning mutagenesis has been particularly popular for the stabilisation of GPCRs and has  
57 had highly successful outcomes for the structural elucidation of this extremely important class of  
58 membrane protein (9). However, the process by which mutations are made and selected is an  
59 expensive and labour-intensive process due to the fact that every amino acid position must be  
60 mutated individually and tested for changes to protein behaviour (*e.g.* thermostability), and  
61 therefore this approach has been somewhat exclusive to industry. Furthermore, scanning  
62 techniques are limited to finding single positions at a time, and provide no information about  
63 additive effects of combined mutations. Instead, amino acid positions initially identified by scanning  
64 have traditionally been combined in a semi-systematic way (2), and from previous evidence it is  
65 clear that combining single mutations together rarely provides a straight-forward additive effect (2).

66           Alternatively, mutagenesis can be performed randomly using techniques such as error prone  
67 PCR (10) or mutator strains of *E. coli* (11). These random methods can be used for directed evolution  
68 by multiple iterations of random mutagenesis followed by screening. However, these methods  
69 requires the use of rapid, robust and high-throughput assays for evaluating mutational outcomes  
70 (for example levels of GFP fluorescence (5)) and a method to link improvement in function to the  
71 sequence that gave rise to it (for example cell sorting (5) or phage display (12)). However, not all  
72 strategies are amenable to these approaches, as improvements in function may require complex  
73 assays to ascertain. Furthermore, approaches that rely on error-prone PCR are limited due to several  
74 compounding factors. Primarily, certain base-changes are more common than others (10), for  
75 example A for T substitutions are more common than C for G substitutions (10). Secondly, a single  
76 base-pair change to a codon is insufficient for one amino acid to be changed into all other amino  
77 acids, for example, with a single base-pair change, alanine can be mutated to valine, threonine,  
78 proline, serine, aspartate, glutamate or glycine, but not to anything else. Under conventional error-  
79 prone PCR methods, a double base-pair change in a single codon is statistically unlikely; therefore,  
80 the kinds of changes that can be made to amino acid sequence using error-prone PCR are biased  
81 and limited.

82           Computational methods for predicting and designing advantageous changes to protein  
83 sequence are in their infancy (6). There have been several notable examples of where this approach  
84 has been successful (7, 8), but often relies on pre-existing structural information (which is not always  
85 available) and high-level thermodynamic calculations. Alternatively, deep sequencing information  
86 has been exploited, for example the availability of homologs from thermophilic or thermotolerant  
87 organisms has helped to successfully predict mutations for thermostabilisation of certain  
88 membrane proteins (13). However, not all proteins of interest will have thermostable homologs in  
89 nature.

90           Here, we intend to introduce a statistical method that will be widely applicable to protein  
91 engineering, and pose some significant advantages over other approaches. Our key observation is  
92 that each residue on average interacts with just three or four others, and most of the effects of  
93 mutating a residue will be due to these local interactions. We can sample this space efficiently by  
94 devising a mutation strategy that focuses only on minimal changes. Such a strategy is called a  
95 fractional factorial design. A full factorial design would be one in which there are a number of  
96 ‘factors’ to be tested (i.e. interesting residue positions to mutate) each of which has a number of  
97 discrete ‘levels’ (i.e. mutated or not mutated, or mutated to one of 20 amino acids) and every  
98 combination of these levels across all factors would be tested. A fractional factorial design consists

99 of a carefully selected subset of the combinations available in a full factorial design, chosen to  
100 exploit the sparsity-of-effects principal and reveal the most important information about the system  
101 being studied. Fractional factorial approaches have become an important part of the statistical  
102 toolkit in mechanical engineering and pharmaceutical science, and we intend to apply it to our case  
103 of protein engineering.

104 Fractional factorial approaches have been tried on occasion in protein science: Carter and  
105 Carter in 1979 (14) proposed their use for protein crystallisation, but this approach has been  
106 completely superseded by knowledge-based “sparse-matrix” screens (15). Recently, the fractional  
107 factorial approach was used to optimise protein expression. The factors included different fusion  
108 tags, strains and growth media (16), allowing a more efficient approach to optimising the conditions  
109 than a full factorial design, similar to much earlier work on process optimisation (17). However, none  
110 of this work has focused directly on optimising protein sequence.

111 To demonstrate the ability of fractional factorial design as a useful tool in protein  
112 engineering we have selected the test case of Acridine resistance subunit B (AcrB) from *E. coli*, which  
113 is part of the AcrAB-TolC multi-protein complex, a multi-drug efflux pump of Gram-negative  
114 bacteria. Export proteins such as AcrB have emerged as important players for the clinical treatment  
115 of infectious disease due to the fact that these proteins confer resistance in Gram-negative bacteria  
116 (such as *Salmonella*) to antibiotics, detergents and cationic dyes among others. Aside from its  
117 importance as a target for understanding drug-resistance in pathogenic bacteria, AcrB also has  
118 considerable implications in the field structural biology as *E. coli* AcrB has often been reported as a  
119 contaminant in membrane protein preparations prior to X-ray crystallography (18–20); it is naturally  
120 histidine-rich and therefore readily binds to charged nickel resins (19). As little as picogram  
121 quantities of contaminating AcrB can lead to the formation of characteristic rhombohedral crystals  
122 (20). Highlighting this issue is a report that of 17 integral membrane protein candidates from  
123 *Helicobacter pylori* over expressed in *E. coli*, 45% of crystal hits were discovered to be AcrB crystals  
124 (20).

125 The routine contamination of AcrB is in part due to the fact that levels of AcrAB transcription  
126 are inversely proportional to the bacterial rate of growth (21). AcrB expression is therefore greatest  
127 in the late stationary phase of growth, as induced by standard laboratory over-expression methods.  
128 Furthermore, increasing the stringency of purification steps proven effective in the elimination of  
129 other contaminants such as succinate dehydrogenase (20), fails for AcrB due to its particularly high  
130 affinity for nickel, thus, making it very difficult to remove by conventional means, resulting in its co-  
131 purification alongside his-tagged proteins of interest.

132 Deleting the histadine rich C-terminus of AcrB has not been successful, and *E. coli* strains  
133 with inactive AcrB ( $\Delta$ AcrB) tend to be more sensitive to antibiotics (22) a serious concern for the use  
134 of over-expression systems. Therefore, a better approach is to introduce the minimal number of  
135 changes required to reduce the affinity of *E. coli* AcrB to nickel sepharose resin to produce functional  
136 AcrB with reduced affinity for nickel that can replace wild-type AcrB in *E. coli* expression strains.  
137 Furthermore, success in this goal will demonstrate the validity and strengths of fractional factorial  
138 design as a valuable tool for protein engineering.

139

## 140 Results

141 *E. coli* AcrB has eleven histidine residues per protomer (33 across the trimer), of which seven (H505,  
142 H525, H526, H1042, H1044, H1048 and H1049) are clustered on the cytoplasmic proximal face (**Fig.**  
143 **1**). Due to their proximity to one another and position on the surface of the protein these seven  
144 histidine residues were selected as likely candidates for the innate affinity of AcrB for nickel. To  
145 investigate the possible contribution of these residues to nickel binding, we used a fractional  
146 factorial design to distinguish primary effects of individual mutations (*main effects*) from pairwise  
147 effects of two residues acting together synergistically (*two-way effects*) (**Table 1**).

148 *E. coli* AcrB with an N-terminal GFP fusion was constructed and each combination of  
149 mutations specified by the fractional factorial design was produced by site-directed mutagenesis  
150 (**Table 1**). Each construct was expressed in replicate in AcrB knockout *E. coli* and crudely purified on  
151 small-scale nickel affinity columns in parallel. We were unable to obtain construct 14 at the time of  
152 running the experiment, but due to the robust nature of the fractional factorial methodology,  
153 missing values can be tolerated and therefore we proceeded regardless. The effect of histidine  
154 mutants on the binding of AcrB to nickel resin could be observed by measuring in-gel GFP signals  
155 (**Fig. 2 and Fig. S1**).

156 Statistical analysis of the relative amount of GFP fluorescence in the elution allowed us to  
157 determine the main effects; we could determine which mutations to AcrB had the most significant  
158 effect on nickel binding (**Table 2**). Refinement of the model was carried out to include only the most  
159 significant main and two-way effects, confirming that these contributions were highly significant  
160 (**Table 3**).

161 The refined model (**Table 3**) clearly shows that mutation of H505, H525, H1042 and H1044  
162 have the most significant effect on reducing the affinity of *E. coli* AcrB for nickel (**Fig. 3**). Notably,  
163 the effects of each mutation are not additive, particularly in the case of H1044, which does not give  
164 any further improvement in the presence of the other mutations, but can replace any one of them

165 to give essentially identical effects (**Table 4**). This result suggests that a synergistic contribution of  
166 the histidine residues is responsible for nickel binding, agreeing with the hypothesis that several  
167 spatially close histidine residues are required for nickel ion coordination. Therefore, mutations to  
168 H505, H525 and H1042 will produce *E. coli* AcrB with low affinity to nickel, but any one of these  
169 mutations could be replaced by mutation of H1044 to get essentially the same result.

170 There is a caveat to add; due to the nature of the minimal design, we cannot be sure that  
171 the large interactions we see are really due to the mutations they are labelled by. For example, the  
172 interaction labelled H505:H1044, really estimates this plus H525:H526 plus H1042:H1049, but given  
173 that the main effects of H526 and H1049 are close to zero, it would be a strange system that gave  
174 this result. It would mean that, for example, H526 had a large beneficial effect in the absence of  
175 H525 and a large detrimental effect in the presence of H525 and these two effects were of almost  
176 exactly the same size.

177 To confirm that mutations to residues H505, H525, H1042 and H1044 could produce an AcrB  
178 construct with reduced affinity for nickel, those mutations were combined, and an extensive  
179 purification procedure was tested; washing the nickel sepharose resin with 10 column volumes of  
180 wash buffer (**Fig. 4**). There was significantly less ( $p > 0.01$ ) AcrB eluted from nickel sepharose when  
181 residues H505, H525, H1042 and H1044 were mutated to alanine in comparison to AcrB with wild-  
182 type sequence (**Fig. 4**), most of the AcrB had eluted during the wash steps. This result confirms that  
183 this combination of mutations are the optimum for creating a low nickel affinity AcrB construct.

184

## 185 Discussion

186 Here, we have demonstrated the use of fractional factorial design for protein design and  
187 engineering. At the outset of the work the C-terminal residues (H1042, H1044, H1048 and H1049)  
188 were suspected to be the main contributors to nickel sepharose binding (25), but there were also  
189 histidine residues distant in sequence but spatially close to the C-terminus (H505, H525 and H526).  
190 We tested a small subset of different specific combinations of alanine replacements at these seven  
191 histidine residues in the native AcrB sequence designed in a fractional factorial screen (**Table 1**).  
192 Statistical analyses of the results suggested that mutations of residues H505, H525, H1042 and  
193 H1044 had the biggest effect on binding (**Fig. 3**), and we confirmed this to be the case experimentally  
194 (**Fig. 4**). This novel result is in contrast with the originally held belief that *only* C-terminal residues  
195 were important in nickel sepharose binding; the best combination of mutations could not be  
196 predicted prior to the experiment.

197 We note that the residues important for nickel binding form two spatially close pairs; pair  
198 H505:H525 and pair H1042:H1044 (**Fig. 3**), and we hypothesise that these residues are at the correct  
199 distance apart from one another to correctly coordinate the nickel ions. However, there are also  
200 spatially close pairs of histidine residues that were not indicated to be important for nickel binding,  
201 such as, H525:H526 and H1048:H1049. It is possible that histidine residues directly adjacent to one  
202 another cannot adopt the correct geometry in order to correctly coordinate nickel ions. However,  
203 this interpretation does not explain why H1044 which is  $\sim 27$  Å distant from H505 and H525 in the  
204 crystal structure appears to behave in a synergistic manner with all three of the other residues  
205 indicated to be important (H505, H525 and H1042). One possibility is that any analysis based on the  
206 crystal structure alone does not account for any flexibility of the C-terminus of AcrB in solution.  
207 Indeed, of the numerous crystal structures of AcrB available in the protein data bank, the large  
208 majority of these structures are missing electron density for the C-terminal region, indicating that  
209 this is a flexible part of the protein. The position of H1044 on the end of the flexible C-terminus may  
210 allow it to come closer to H505 and H525 in solution in order to assist in the coordination of a nickel  
211 ion.

212 The fractional factorial design allowed us to sample a large mutational space ( $2^7$   
213 combinations) with just an eighth of this total number of combinations of mutations. The fractional  
214 factorial design allowed a thorough investigation of mutations that reduce binding of AcrB to nickel  
215 sepharose, but reduced the amount of work and material costs by a factor of eight; we could  
216 understand the effect of mutating everything in every combination while only having to perform an  
217 eighth of that total experiment. Furthermore, we were able to handle the absence of results for one  
218 of the tests in the series without losing information about the main effects, highlighting one of the  
219 strengths of the fractional factorial methodology. This attribute of the fractional factorial design  
220 would be highly desirable in high-throughput cloning campaigns as is generally required for protein  
221 engineering, as absences of some mutations due to errors in cloning or expression can be ignored  
222 without significant detriment to the understanding of main-effects in the system.

223 There would be significant room for expansion for this technique. Here, we have chosen a  
224 system that was manageable on a small scale; however, with the use of high-throughput cloning  
225 methods as often applied for other protein engineering applications there is no reason this  
226 technique could not be expanded to cover an even larger mutational space. For example, here we  
227 have concentrated on mutating each position to just one other residue (alanine), and a third amino  
228 acid could easily be added without making the scale of the experiment too large to handle: for a full



229 factorial of that experiment,  $3^7$  combinations would be required, but using fractional factorial design  
230 the space could be sampled with just 82 combinations of mutants in a  $1/27$  experiment.

231 The specific use of fractional factorial design demonstrated here validates the use of this  
232 method for protein engineering, and provides a framework to apply it broadly for many other  
233 applications. For example, we believe this could have important application in the investigation of  
234 altering enzyme active site residues to change affinity for substrate or alter substrate preference. In  
235 the case of active site residues, it is often clear which residues form the most important interactions  
236 with substrate to define specificity or catalytic activity, but unclear what combination of changes to  
237 those residues (of the 20 amino acids) will have the desired effect on enzyme catalysis. We propose  
238 that fractional factorial design would provide an excellent framework to allow comprehensive  
239 understanding of the effect of changing all residues in an active site in all combinations, allowing  
240 the sampling of a broad range of possible ways to modify the properties of the enzymatic reaction.

241 We also see a broad benefit of using fractional factorial design for altering the residues of  
242 antibody complementarity determining regions (CDR) in order to improve the affinity of the  
243 antibody for its epitope. Typically, antibody maturation and CDR improvement is done using random  
244 mutagenesis. However, as discussed above, there are biases in random mutagenesis that will  
245 prevent the full range of mutational space from being accessed. We propose that a fractional  
246 factorial approach would allow a much broader sampling of the possible mutational space, and by  
247 limiting mutation to just the CDRs the experiments will not be unfeasibly large.

248 In the case of protein stabilisation, fractional factorial design may not be able to replace  
249 scanning or random mutagenesis methods for the initial identification of single positions with  
250 beneficial effects to protein stability due to the staggering large number of possible combinations  
251 even in a small protein. However, fractional factorial design can be extremely valuable to help  
252 determine which of the mutations initially identified by other methods should be combined, and  
253 suggesting the minimal number of changes required for maximal effect.

254 In combination with stability assays, we also envisage the use of fractional factorial design  
255 to infer two-way effects (pairs of residues that do not have an additive effect) allowing us to  
256 experimentally determine the proximity of residues to one another. This type of information can be  
257 highly informative in proteins of unknown structure, as these residue pairs can act as distance  
258 constraints for guiding and improving computationally derived protein models.

259



## 260 **Materials and methods**

### 261 **Fractional factorial design**

262 The *E. coli* AcrB residues H505, H525, H526, H1042, H1044, H1048 and H1049 were taken as the  
263 seven factors for investigation, with two levels for each factor to be investigated (non-mutated; -  
264 or mutated to alanine; +) (**Table 5**)

265 A 1/8 design was used (16 runs in the fractional factorial design vs 128 runs in the full  
266 factorial design) (Table 1), which can provide information about main effects and some two-way  
267 effects can be inferred.

268

### 269 **AcrB mutagenesis**

270 The *E. coli* AcrB gene was cloned into a pET-21-GFP vector (pET-21-GFP-AcrB) to create the initial  
271 GFP-tagged AcrB construct. Mutagenic primers were designed using either “QuickChange” or  
272 “Round-the-Horn” methods (26). Mutations were introduced into AcrB sequentially as constructs  
273 required between three and seven mutations in total. Briefly, 10  $\mu$ L PCR reactions were setup using  
274 mutagenic primers, Q5 DNA polymerase (NEB, Ipswich, USA) and the pET21-GFP-AcrB template (at  
275 approximately 10 ng/ $\mu$ L). The reaction was carried out (Thermal Cycler, Bio-Rad, Hercules, USA) with  
276 primer annealing temperatures determined theoretically, and a long elongation time (30 seconds  
277 per kbp; 3.5 minutes). Following PCR the reactions were treated with either DpnI or a mixture of T4  
278 DNA Ligase, T4 Polynucleotide Kinase and DpnI for the QuickChange or “Round-the-Horn” methods,  
279 respectively (all enzymes were supplied by NEB, Ipswich, USA). These reactions were incubated at  
280 room temperature for 1 hour before transformation into chemically competent OmniMAX *E. coli*  
281 cells, plating on LB agar plates containing 100  $\mu$ g/mL carbenicillin and overnight incubation at 37°C.  
282 Correctly mutated plasmids were confirmed by sanger sequencing (Eurofins genomics, Luxembourg,  
283 Switzerland) after mini-prep plasmid purification (Nucleospin Plasmid kit; Macherey-Nagel, Düren,  
284 Germany) from overnight culture of single colonies in LB containing 100  $\mu$ g/mL ampicillin and  
285 incubation at 37°C.

286

### 287 **AcrB expression and quantification of affinity for nickel**

288 Chemically competent *E. coli* strain C41  $\Delta$ AcrB pRARE2 were transformed with the 16 pET-21-GFP-  
289 AcrB constructs using heat-shock method and plated onto LB agar plates containing 100  $\mu$ g/mL  
290 carbenicillin. Three single colonies were selected for each AcrB construct and used to inoculate 4  
291 mL of auto-induction media (Na<sub>2</sub>HPO<sub>4</sub>, 10 mM, KH<sub>2</sub>PO<sub>4</sub>, 5 mM, tryptone, 0.2 % (w/v), yeast extract,  
292 0.05 % (w/v), NaCl, 20 mM, Glycerol, 0.6 % (v/v), glucose, 0.05 % (w/v), lactose 0.2 % (w/v), 100

293  $\mu\text{g}/\text{mL}$  ampicillin). Cultures were grown in sterile 24-well deep-well blocks, incubated at  $30^{\circ}\text{C}$  with  
294 shaking at 200 rpm for 6 hours before cooling to  $18^{\circ}\text{C}$  with shaking at 200 rpm overnight.

295 Bacterial pellets were collected by centrifugation at  $3000 \times g$  for 10 mins and washed once  
296 with 1 mL MilliQ- $\text{H}_2\text{O}$ . Pellets were re-suspended in 250  $\mu\text{L}$  of Lysis/Solubilisation buffer (20 mM  
297 Tris-HCl pH 8, 300 mM NaCl, 1.5 % (w/v) dodecyl maltoside, 2  $\mu\text{g}/\text{mL}$  DNase I, 3 x EDTA-free protease  
298 inhibitor cocktail) and solubilised with mixing at  $4^{\circ}\text{C}$  for 1 hour. 100  $\mu\text{L}$  of pre-equilibrated nickel  
299 sepharose resin (Ni sepharose 6 ff, GE Healthcare, Chicago, USA) slurry was transferred to each well  
300 of a UniFilter GF/B pore size 1  $\mu\text{m}$  Conical Bottom 96-well Filter Plate (Whatman, Little Chalfont, UK)  
301 and spun dry ( $1000 \times g$ , 5 mins). Solubilised cell lysate was centrifuged for 10 minutes at  $3000 \times g$ ,  
302  $4^{\circ}\text{C}$  before 200  $\mu\text{L}$  of each condition was applied to the 96-well filter plate and protein was allowed  
303 to batch-bind with the nickel resin at  $4^{\circ}\text{C}$  at 1000 rpm (Eppendorf MixMate; Eppendorf, Hamburg,  
304 Germany).

305 After batch binding, the plate was centrifuged at  $1000 \times g$  for 1 min and “flow-through”  
306 collected. 200  $\mu\text{L}$  of Buffer A (20 mM Tris-HCl pH 8, 300 mM NaCl, 50 mM imidazole, 0.05 % (w/v)  
307 dodecyl maltoside) was then added to each well and incubated for a further 10 mins at  $4^{\circ}\text{C}$  with  
308 mixing at 1000 rpm (Eppendorf MixMate; Eppendorf, Hamburg, Germany). The plate was  
309 centrifuged at  $1000 \times g$  for 1 min and “wash” collected. 200  $\mu\text{L}$  of Buffer B (20 mM Tris-HCl pH 8,  
310 300 mM NaCl, 250 mM imidazole, 0.05 % (w/v) dodecyl maltoside) was then added to each well and  
311 incubated for a further 10 mins at  $4^{\circ}\text{C}$  with mixing at 1000 rpm (Eppendorf MixMate; Eppendorf,  
312 Hamburg, Germany). The plate was centrifuged for a final time at  $1000 \times g$  for 1 min and “elution”  
313 collected. 50  $\mu\text{L}$  samples from the “solubilised lysate”, “flow-through”, “wash” and “elution” were  
314 mixed with 5 x SDS-PAGE loading buffer (250 mM Tris-HCl, pH 6.8, 10 % SDS, 30 % (v/v) glycerol, 10  
315 mM DTT, 0.05 % (w/v) Bromophenol Blue). Samples were loaded onto 15-well 4-20 % Mini-  
316 PROTEAN pre-cast PAGE gels (Bio-Rad, Hercules, USA) and run for 1 hour at 150 V in SDS-PAGE  
317 running buffer (25 mM tris-HCl pH 8.3, 193 mM glycine, 0.1 % (w/v) SDS). In-gel GFP fluorescence  
318 was visualised (G:BOX Chemi XX6 with Blue LEDs; Syngene, Gurgaon, India) before Coomassie  
319 staining (QuickStain; Generon, Slough, UK). In-gel GFP fluorescence was analysed using Fiji (27) to  
320 determine the pixel density of each band containing GFP-AcrB. The pixel density corresponding to  
321 GFP fluorescence in the elution relative to the total GFP signal across the flow-through, wash and  
322 elution was used to compare the relative affinity for nickel between the different constructs. Error  
323 bars are representative of the standard deviation over three individual repeats for each sample.

324

## 325 **Analysis of fractional factorial experiment**

326 Statistical analysis of the fractional factorial experiment was carried out using R, a language and  
327 environment for statistical computing (<https://www.R-project.org>).

328

## 329 **Acknowledgements**

330 We wish to thank Clair Philips for assisting with mutagenesis.

331 The *E. coli* strain C41  $\Delta$ *AcrB* pRARE2 was a kind gift from Dr. Vincent Postis

332

## 333 **Contributions**

334 S. P. D. H., S. G. G. and A. G. designed the experiments. S. P. D. H., D. W., J. M and A. M. performed  
335 the mutagenesis and binding experiments. S. P. D. H., S. G. G. and A. G. analysed the data and wrote  
336 the paper.

337

## 338 **Funding**

339 Work performed by S. P. D. H. was funded by the BBSRC

340 Work performed by D. W. was funded by the Leeds University Deans Vacation Scholarship

341

## 342 **References**

- 343 1. Cunningham B, Wells J (1989) High-resolution epitope mapping of hGH-receptor  
344 interactions by alanine-scanning mutagenesis. *Science (80- )* 244(4908):1081–1085.
- 345 2. Magnani F, et al. (2016) A mutagenesis and screening strategy to generate optimally  
346 thermostabilized membrane proteins for structural studies. *Nat Protoc* 11(8):1554–1571.
- 347 3. Magnani F, Shibata Y, Serrano-Vega MJ, Tate CG (2008) Co-evolving stability and  
348 conformational homogeneity of the human adenosine A2a receptor. *Proc Natl Acad Sci*  
349 105(31):10744–10749.
- 350 4. Sarkisyan KS, et al. (2016) Local fitness landscape of the green fluorescent protein. *Nature*  
351 533(7603):1–11.
- 352 5. Klenk C, Ehrenmann J, Schütz M, Plückthun A (2016) A generic selection system for  
353 improved expression and thermostability of G protein-coupled receptors by directed  
354 evolution. *Sci Rep* 6(November 2015):21294.
- 355 6. Tate CG (2015) Identifying Thermostabilizing Mutations in Membrane Proteins by  
356 Bioinformatics. *Biophys J* 109(7):1307–1308.

- 357 7. Bhattacharya S, Lee S, Grisshammer R, Tate CG, Vaidehi N (2014) Rapid Computational  
358 Prediction of Thermostabilizing Mutations for G Protein-Coupled Receptors. *J Chem Theory*  
359 *Comput* 10(11):5149–5160.
- 360 8. Yasuda S, et al. (2016) Identification of Thermostabilizing Mutations for Membrane  
361 Proteins: Rapid Method Based on Statistical Thermodynamics. *J Phys Chem B* 120(16):3833–  
362 3843.
- 363 9. Heydenreich FM, Vuckovic Z, Matkovic M, Veprintsev DB (2015) Stabilization of G protein-  
364 coupled receptors by point mutations. *Front Pharmacol* 6(MAR):1–15.
- 365 10. Wilson DS, Keefe AD (2001) Random Mutagenesis by PCR. *Current Protocols in Molecular*  
366 *Biology* (John Wiley & Sons, Inc., Hoboken, NJ, USA), p Unit8.3.
- 367 11. Echols H, Lu C, Burgers PM (1983) Mutator strains of Escherichia coli, mutD and dnaQ, with  
368 defective exonucleolytic editing by DNA polymerase III holoenzyme. *Proc Natl Acad Sci*  
369 80(8):2189–2192.
- 370 12. Lee CMY, Iorno N, Siervo F, Christ D (2007) Selection of human antibody fragments by phage  
371 display. *Nat Protoc* 2(11):3001–3008.
- 372 13. Sauer DB, Karpowich NK, Song JM, Wang D-N (2015) Rapid Bioinformatic Identification of  
373 Thermostabilizing Mutations. *Biophys J* 109(7):1420–1428.
- 374 14. Carter CW, Carter CW (1979) Protein Crystallization Using Incomplete Factorial-  
375 Experiments. *J Biol Chem* 254(23):2219–2223.
- 376 15. Jancarik J, Kim SH (1991) Sparse matrix sampling: a screening method for crystallization of  
377 proteins. *J Appl Crystallogr* 24(4):409–411.
- 378 16. Papanepoytous CP, Kontopidis G (2014) Statistical approaches to maximize recombinant  
379 protein expression in Escherichia coli: A general review. *Protein Expr Purif* 94:22–32.
- 380 17. He GQ, Kong Q, Ding LX (2004) Response surface methodology for optimizing the  
381 fermentation medium of Clostridium butyricum. *Lett Appl Microbiol* 39(4):363–368.
- 382 18. Veessler D, Blangy S, Cambillau C, Sciara G (2008) There is a baby in the bath water: AcrB  
383 contamination is a major problem in membrane-protein crystallization. *Acta Crystallogr Sect*  
384 *F Struct Biol Cryst Commun* 64(10):880–885.
- 385 19. Glover CAP, et al. (2011) AcrB contamination in 2-D crystallization of membrane proteins:  
386 Lessons from a sodium channel and a putative monovalent cation/proton antiporter. *J*  
387 *Struct Biol* 176(3):419–424.
- 388 20. Psakis G, Polaczek J, Essen L-O (2009) AcrB et al.: Obstinate contaminants in a picogram  
389 scale. One more bottleneck in the membrane protein structure pipeline. *J Struct Biol*

- 390 166(1):107–111.
- 391 21. Eaves DJ, Ricci V, Piddock LJ V (2004) Expression of *acrB*, *acrF*, *acrD*, *marA*, and *soxS* in  
392 *Salmonella enterica* serovar Typhimurium: role in multiple antibiotic resistance. *Antimicrob*  
393 *Agents Chemother* 48(4):1145–50.
- 394 22. Padilla E, et al. (2010) *Klebsiella pneumoniae* AcrAB efflux pump contributes to  
395 antimicrobial resistance and virulence. *Antimicrob Agents Chemother* 54(1):177–83.
- 396 23. Eicher T, et al. (2012) Transport of drugs by the multidrug transporter AcrB involves an  
397 access and a deep binding pocket that are separated by a switch-loop. *Proc Natl Acad Sci*  
398 109(15):5687–5692.
- 399 24. Schrödinger, LLC (2015) *The {PyMOL} Molecular Graphics System, Version~1.8*.
- 400 25. Wiseman B, et al. (2014) Stubborn Contaminants: Influence of Detergents on the Purity of  
401 the Multidrug ABC Transporter BmrA. *PLoS One* 9(12):e114864.
- 402 26. Hemsley A, Arnheim N, Toney MD, Cortopassi G, Galas DJ (1989) A simple method for site-  
403 directed mutagenesis using the polymerase chain reaction. *Nucleic Acids Res* 17(16):6545–  
404 51.
- 405 27. Schindelin J, et al. (2012) Fiji: an open-source platform for biological-image analysis. *Nat*  
406 *Methods* 9(7):676–682.
- 407
- 408

409 **Tables**

410 Table 1 – Design of the fractional factorial experiment

| Constructs/Runs | H505A | H525A | H526A | H1042A | H1044A | H1048A | H1049A |
|-----------------|-------|-------|-------|--------|--------|--------|--------|
| 1 (WT)          | -     | -     | -     | -      | -      | -      | -      |
| 2               | -     | -     | -     | +      | -      | +      | +      |
| 3               | -     | -     | +     | -      | +      | +      | +      |
| 4               | -     | -     | +     | +      | +      | -      | -      |
| 5               | -     | +     | -     | -      | +      | +      | -      |
| 6               | -     | +     | -     | +      | +      | -      | +      |
| 7               | -     | +     | +     | -      | -      | -      | +      |
| 8               | -     | +     | +     | +      | -      | +      | -      |
| 9               | +     | -     | -     | -      | +      | -      | +      |
| 10              | +     | -     | -     | +      | +      | +      | -      |
| 11              | +     | -     | +     | -      | -      | +      | -      |
| 12              | +     | -     | +     | +      | -      | -      | +      |
| 13              | +     | +     | -     | -      | -      | +      | +      |
| 14              | +     | +     | -     | +      | -      | -      | -      |
| 15              | +     | +     | +     | -      | +      | -      | -      |
| 16              | +     | +     | +     | +      | +      | +      | +      |

-; not mutated to alanine, +; mutated to alanine

411

412 Table 2 – Model 1 – Equal contributions

|             | effect | p-value | significance |
|-------------|--------|---------|--------------|
| (Intercept) | 9.131  |         |              |
| H505A       | -1.714 | 0.1303  |              |
| H525A       | -1.463 | 0.1868  |              |
| H526A       | -0.685 | 0.5152  |              |
| H1042A      | -1.623 | 0.1486  |              |
| H1044A      | -2.314 | 0.0538  | .            |
| H1048A      | -1.398 | 0.2047  |              |
| H1049A      | -1.015 | 0.3437  |              |

Signif. codes: 0 '\*\*\*' 0.001 '\*\*' 0.01 '\*' 0.05 '.' 0.1 ' ' 1

Residual standard error: 14.64 on 7 degrees of freedom

(1 observation deleted due to missingness)

Multiple R-squared: 0.7262, Adjusted R-squared: 0.4524

F-statistic: 2.652 on 7 and 7 DF, p-value: 0.1108

413

414

415 Table 3 – Model 2 - Refined model to include most significant main and two-way effects

|             | effect | p-value  | significance |
|-------------|--------|----------|--------------|
| (Intercept) | 22.745 |          |              |
| H505        | -6.84  | 0.000244 | ***          |
| H525        | -6.156 | 0.000465 | ***          |
| H1042       | -6.592 | 0.000306 | ***          |
| H1044       | -4.149 | 0.004299 | **           |
| H505:H1044  | 5.834  | 0.000641 | ***          |
| H525:H1044  | 3.929  | 0.005682 | **           |
| H1042:H1044 | 5.592  | 0.000823 | ***          |

Signif. codes: 0 '\*\*\*' 0.001 '\*\*' 0.01 '\*' 0.05 '.' 0.1 ' ' 1

Residual standard error: 5.365 on 7 degrees of freedom

(1 observation deleted due to missingness)

Multiple R-squared: 0.9632, Adjusted R-squared: 0.9264

F-statistic: 26.18 on 7 and 7 DF, p-value: 0.0001655

416

417

418 Table 4 - Two-way effects

|       |   | H505 |      | H525 |      | H1042 |      |
|-------|---|------|------|------|------|-------|------|
|       |   | -    | +    | -    | +    | -     | +    |
| H1044 | - | 56.3 | 20.2 | 52.6 | 23.9 | 55.6  | 27.9 |
|       | + | 27.9 | 25.0 | 29.6 | 23.3 | 20.9  | 25.0 |

419

420

421 Table 5

| Factors (residues positions) | Levels (amino acid) |
|------------------------------|---------------------|
| 505                          | - (H), + (A)        |
| 525                          | - (H), + (A)        |
| 526                          | - (H), + (A)        |
| 1042                         | - (H), + (A)        |
| 1044                         | - (H), + (A)        |
| 1048                         | - (H), + (A)        |
| 1049                         | - (H), + (A)        |

422

423

424



425 **Figure legends**

426 Figure 1 – Distribution of histidine residues in the E. coli AcrB structure (PDB code: 4DX5) (23). A)  
427 View perpendicular to the membrane and B) view from the cytoplasmic side of AcrB. Chains A, B  
428 and C are coloured blue, green and red, respectively. Yellow spheres indicate the positions of  
429 histidine residues. A cluster of histidine residues on the cytoplasmic proximal face is outlined with  
430 a dashed line. Images rendered using MacPyMOL (24).

431  
432 Figure 2 – Effect of histidine mutagenesis on the ability of AcrB to bind to nickel resin. A) Example  
433 GFP fluorescence in the total, flow-through, wash and elution samples for three constructs from  
434 the fractional factorial design. B) Normalised histogram of quantified GFP signal for AcrB in the  
435 “flow-through”, “wash” and “elution” from nickel sepharose purification shows effect of  
436 mutagenesis on binding of AcrB to nickel. Error bars: standard deviation from three independent  
437 repeats.

438  
439 Figure 3 – A) Cartoon representation of AcrB trimer (PDB: 4DX5). Chain is represented in bold with  
440 the positions of seven histidine residues represented as spheres. The colour of the spheres  
441 indicates the strength of the effect of their mutation on nickel resin binding (as detailed in the  
442 key). A detailed view of the histidine positions in AcrB from the side (panel B) and top (panel C).  
443 Residues are rendered as red sticks with positions of nitrogen coloured blue. Images rendered  
444 using MacPyMol (24).

445  
446 Figure 4 – Comparison of nickel sepharose binding between A) GFP fusion with wild-type AcrB and  
447 B) GFP fusion with AcrB tetra-mutant H505A, H525A, H1042A and H1044A using 10 column  
448 volume wash (each wash step represents two column volumes). Error bars: standard deviation  
449 from three independent repeats.

450

**A***periplasm*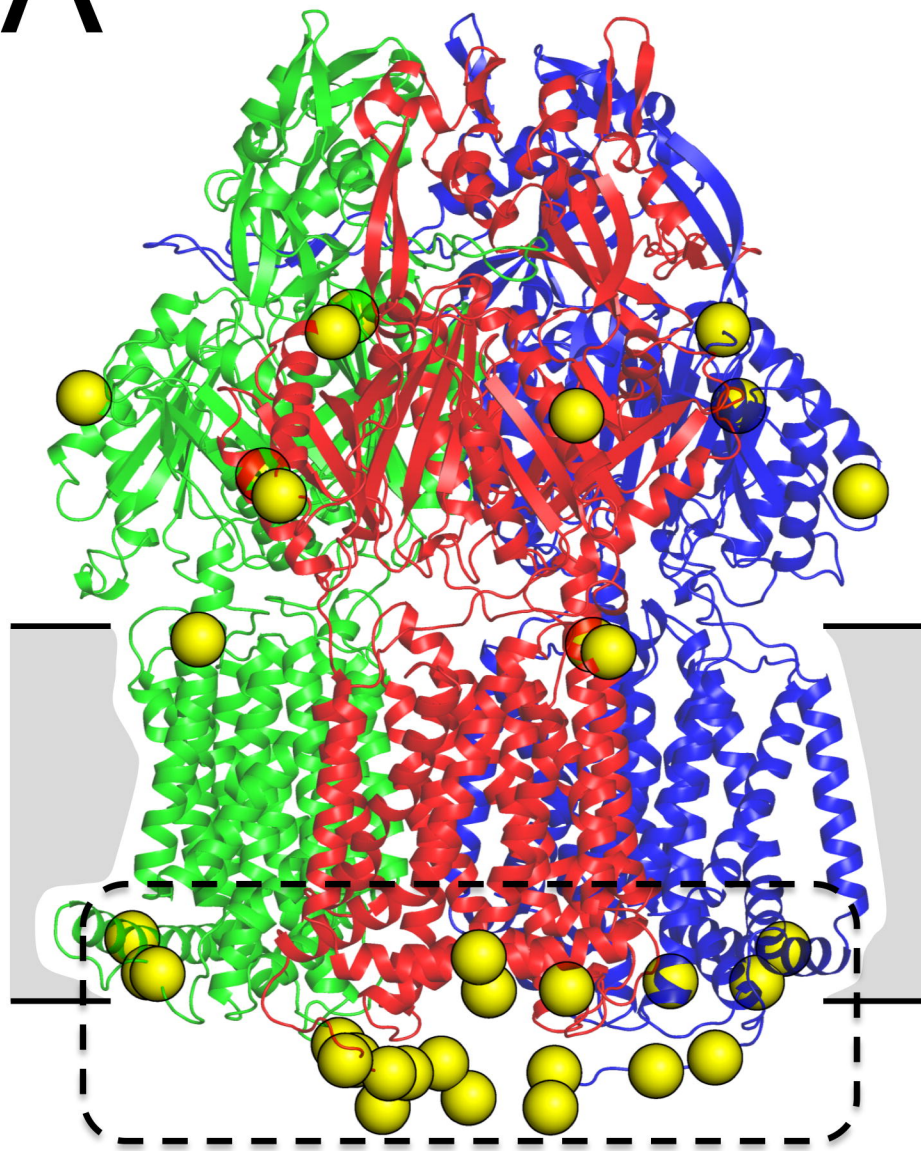*cytoplasm***B**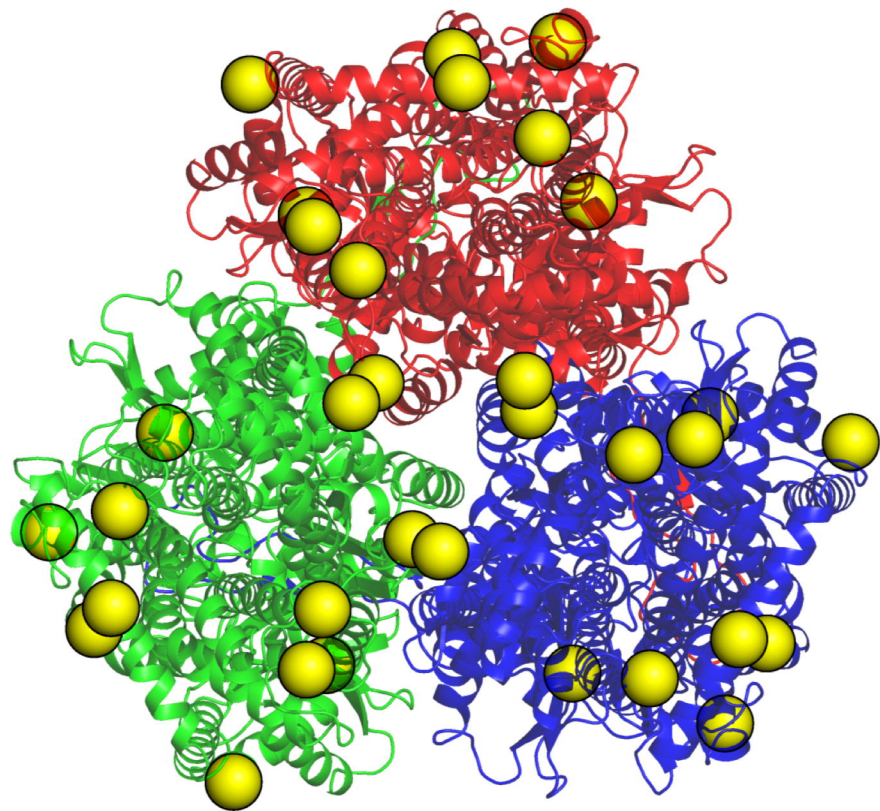

**A**

Total  
Flow-through  
Wash  
Elution

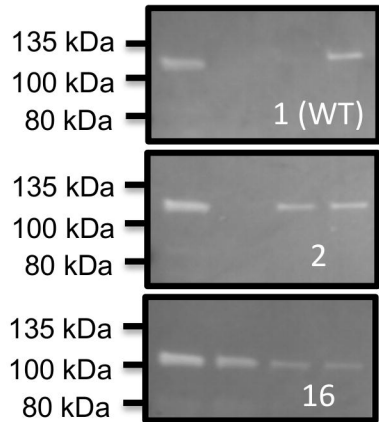**B**

AcrB in elution (%)

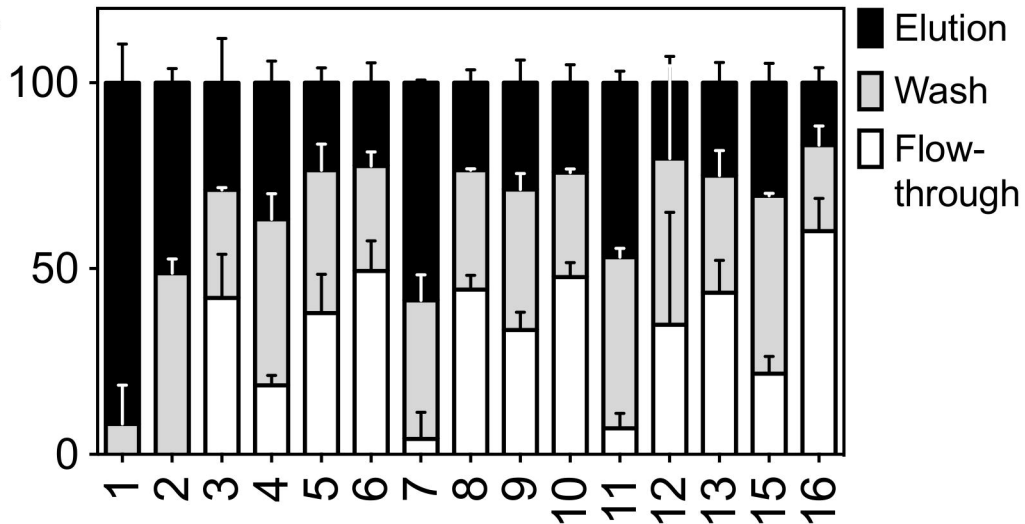



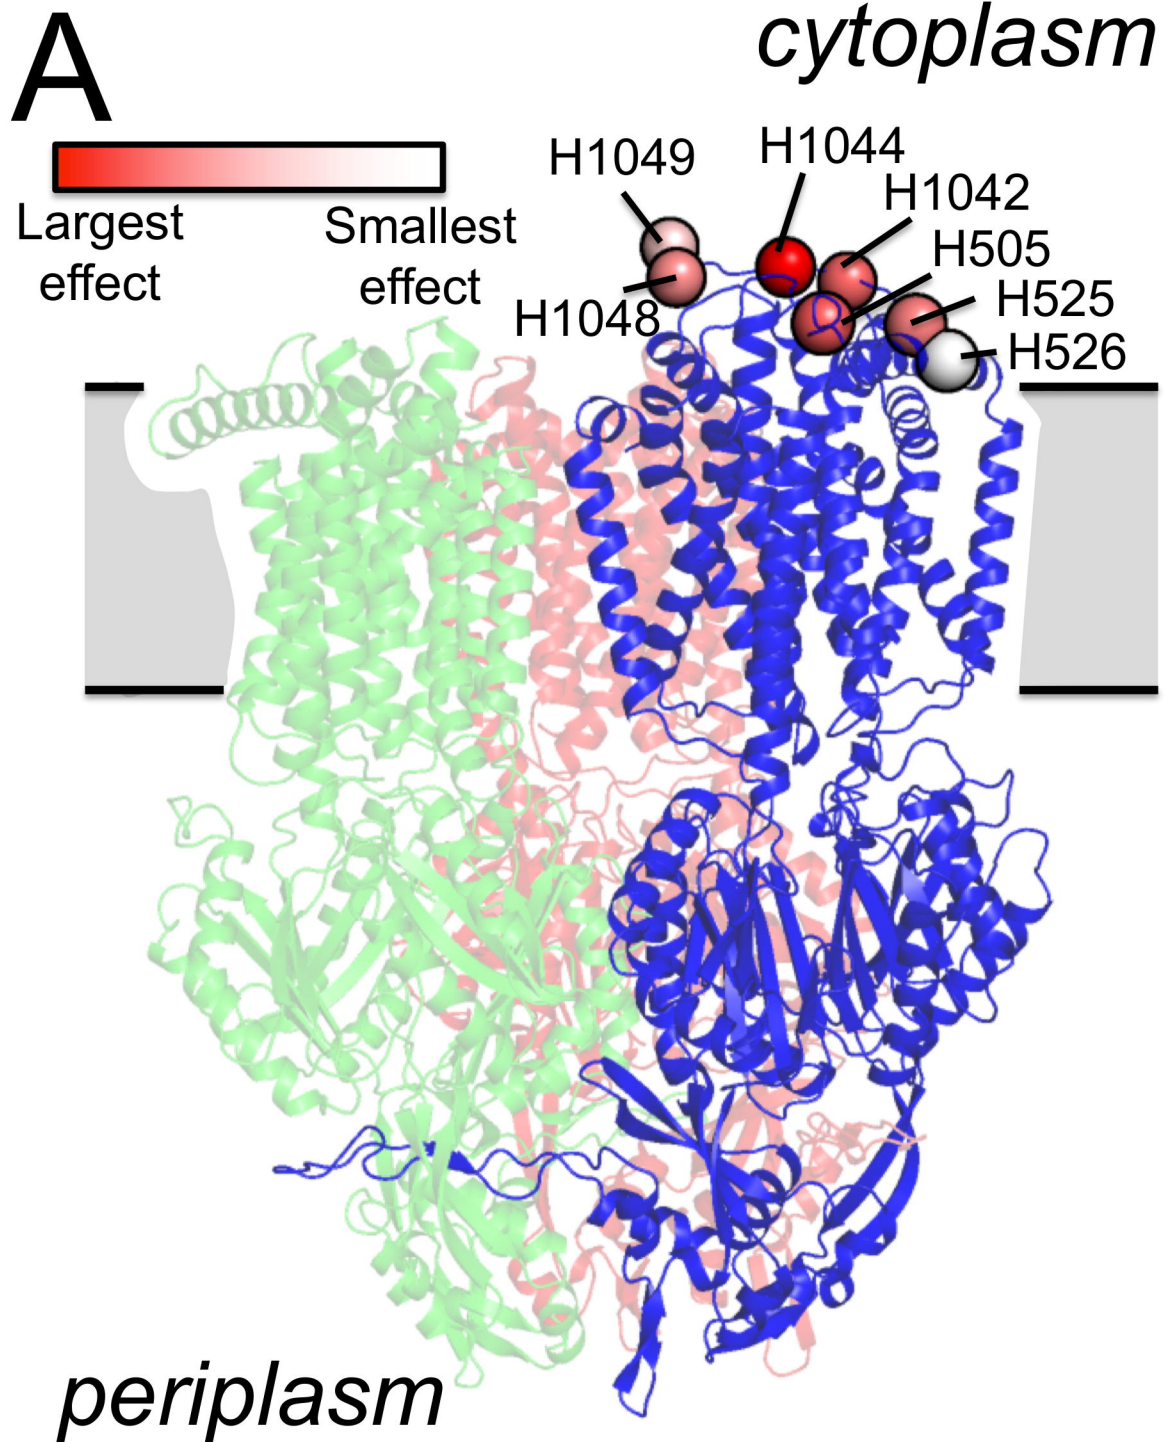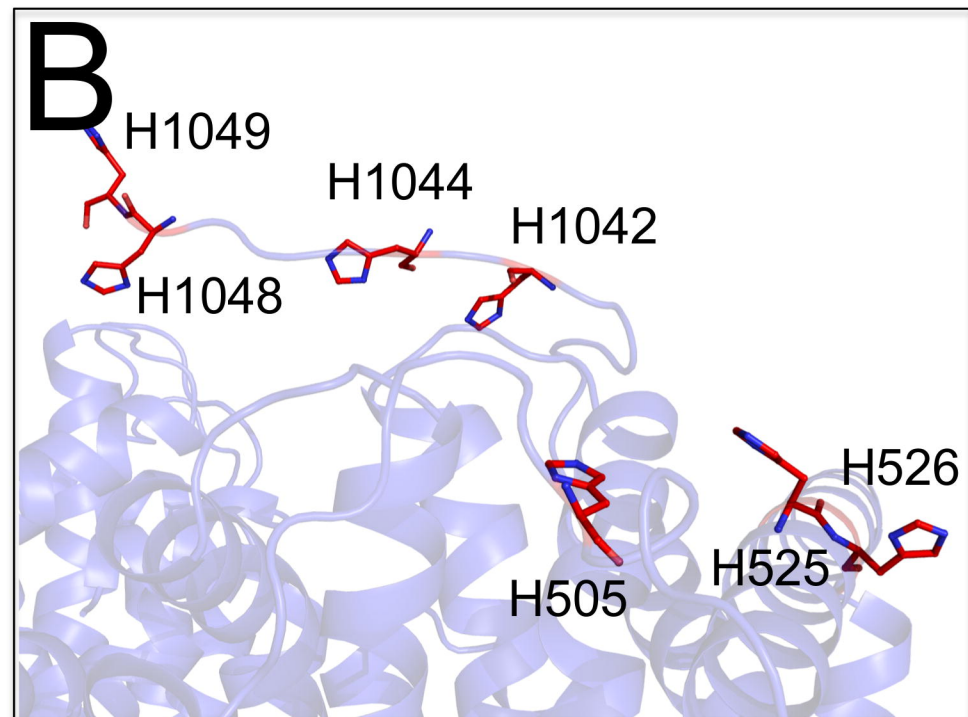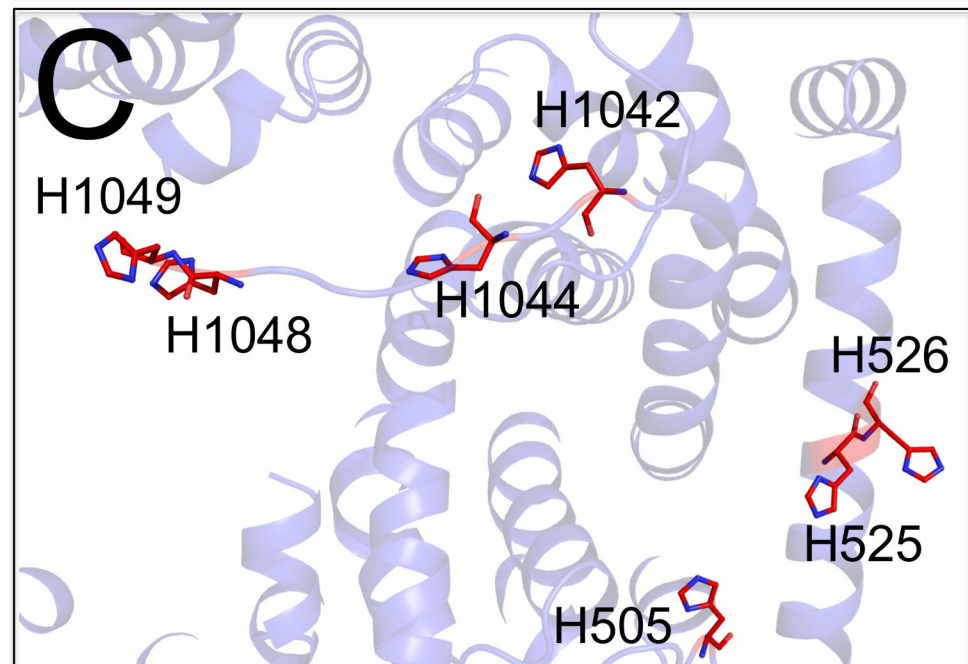

**A**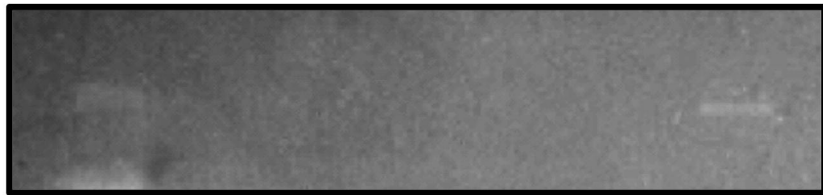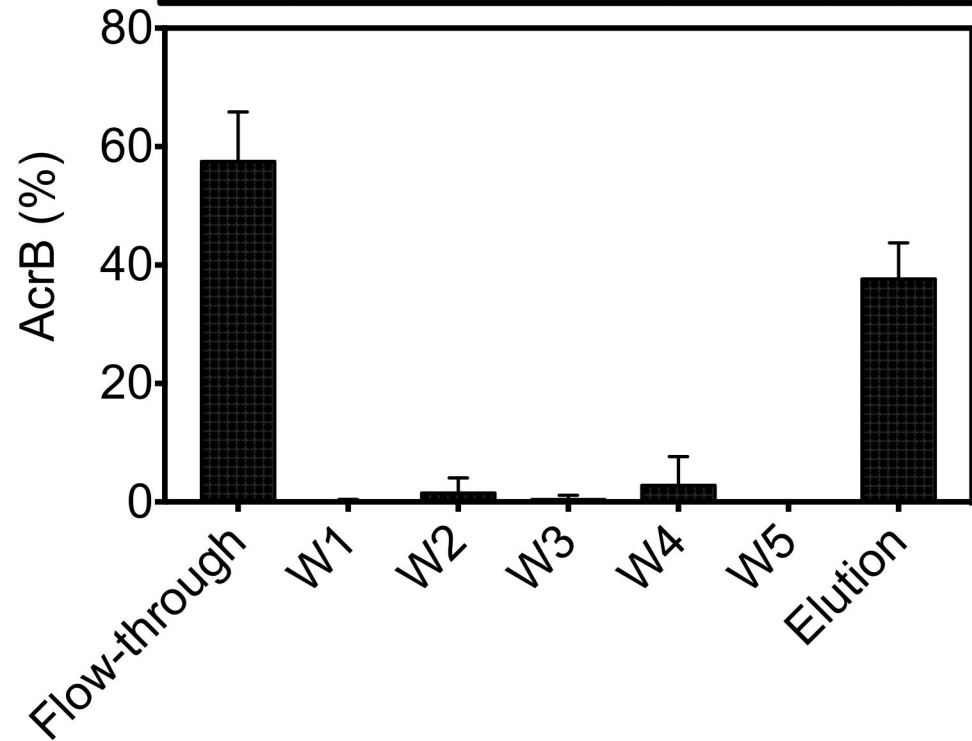**B**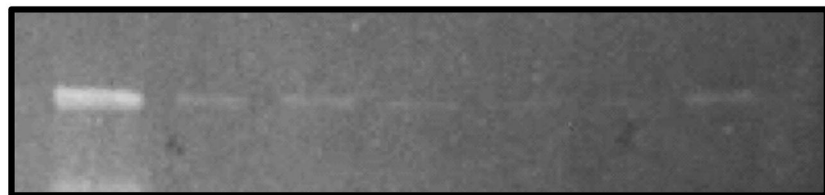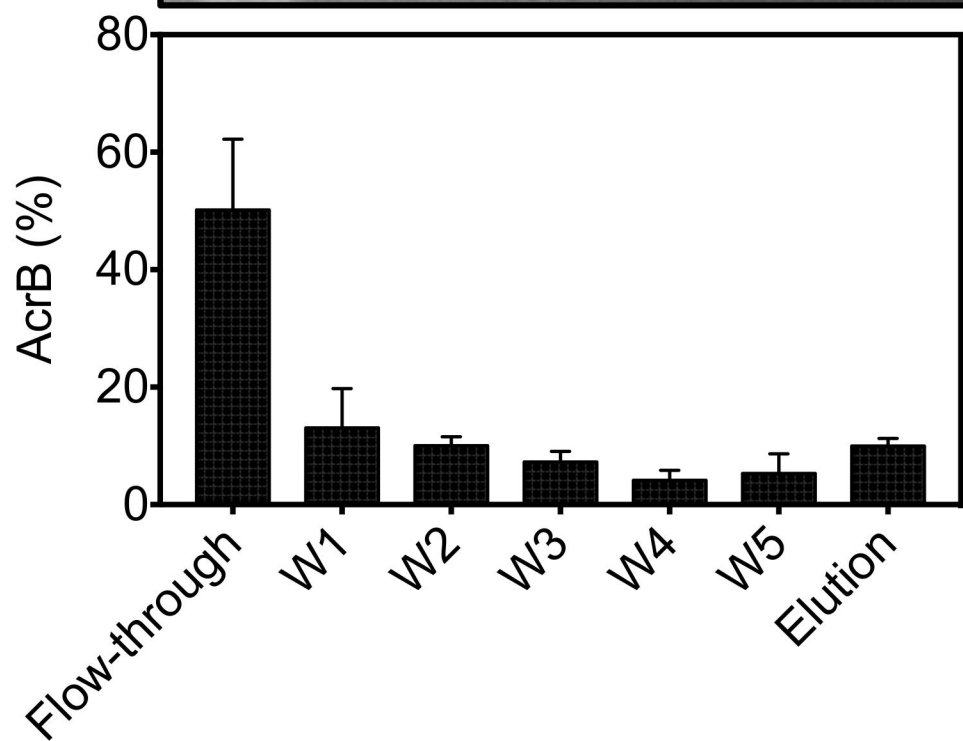

Source: https://www.biorxiv.org/content/10.1101/298273v1.full.pdf
